# Supplementary material for: iCTX-Type: A Sequence-Based Predictor for Identifying the Types of Conotoxins in Targeting Ion Channels
Source: Hindawi journal article supplement (doi:10.1155/2014/286419), 2014-01-01
Supplement: f1 [file 286419.f1.pdf]

**Supporting Information S1.** The benchmark dataset  $\mathcal{S}$  contains 112 conotoxins, of which 24 belong to K-channel-targeting type, 43 to Na-channel-targeting type, and 45 to Ca-channel-targeting type.

### 1. The 24 conotoxins of K-channel-targeting type

```
>sp|P0CY82|13-48
APELVVTATTTCCGYDPM TICPPCMCTHSCPPKRKP
>sp|A3DT44|12-40
APWMVVTATTNCCGYTG PACHPCLCTQSC
>sp|P0CAQ2|12-47
QKELVVTATTTCCGYNPMTSCPRCMCDSSCNKKKKP
>sp|P0CAQ3|12-48
QKELVPSKITTTCCGYSPGTACPSMCTNTCKKKKNKKP
>sp|P0CE75|39-75
QTLVLPSTITTCCGYDPGTMCP TCMCDNTCKPKPKKS
>sp|P0C829|39-80
QKELVPSVITTTCCGYDPGTMCP PCRCTNSCPTKPKKPGRND
>sp|P0C2C6|1-24
DCCGVKLEMCHPCLCDNSCKKSGK
>sp|P69500|27-59
SRCFPPGIYCTPYLPCCWGICCDTCRNVCHLRI
>sp|P0C258|27-57
CRAEGTYCENDSQCC LNECCWGGCGHPCRHP
>sp|P0C615|1-32
CRTEGMSCEENQQCCWRSCCRGECEAPCRFGP
>sp|C7DQY0|27-70
SRCFPPGIYCTPYLPCCWGICCGTCRNDNSSLTFLQFCLPFFFF
>sp|Q0N4U4|40-64
SPGSTICKMACRTGNGHKYPFCNCR
>sp|Q0N4U7|40-64
GPGSAICNMACRLGQGHMYPFCNCN
>sp|Q0N4U3|40-64
SSGSTVCKMMCR LGYGHLYPSCGCR
>sp|Q0N4U8|40-64
FPRPRICNLACRAGIGHKYPFCHCR
>sp|P0C6S2|1-27
GGVGRCIYNMNSGGGLNFIQCKTMCY
>sp|P0C6S3|1-28
RWDVDQCIYYCLNGVVGYSYTECQTMCT
>sp|P0CG45|1-25
LPPCCTPPKKHCPAPACKYKPCKS
>sp|P69769|51-74
LPSCCSLNLRLCPVPACKRNPCT
>sp|P84713|1-13
FHGGSWYRFPWGY
>sp|P56633|46-72
CRIPNQKCFQHLDDCCSRKCNRFNKC V
>sp|P0CY85|24-87
SKRWTRPSVCNLP AESGTGTQSLKRFYYNSDKMQCRTFIYKGNGGNDNNFPRTYDCQ
KKCLYRP
```

>sp|P0C1X2|27-86  
KDRPSLCDLPADSGSGTKAEKRIYYNSARKQCLRFDYTGQGGNENNFRRTYDCQRTC  
LYT  
>sp|P83047|1-9  
GDCPWKPWC

## 2. The 43 conotoxins of Na-channel-targeting type

>sp|P58923|1-30  
SCSGRDSRCPPVCCMGLMCSRKGCVSIYGE  
>sp|P15472|1-34  
ACSGRGSRCPPQCCMGLRCGRGNPQKCIGAHEDV  
>sp|P0C256|1-43  
GHVSCGKDGRACDYHADCCNCCLGGICKPSTSWIGCSTNVFLT  
>sp|P0C257|1-45  
GAVPCGKDGRQCRNHADCCNCCPIGTAPSTNWILPGCSTGQFMT  
>sp|P0C259|1-42  
GCKKDRKPCSYQADCCNCCPIGTAPSTNWILPGCSTGPFMA  
>sp|Q7Z090|36-75  
GPRCWVGRVHCTYHKDCCPSVCCFKGRCKPQSWGCWSGPT  
>sp|P0C612|1-38  
NWSWCSGSGEGCDYHSECCGERCCIESMCIGDGVACWP  
>sp|Q7Z095|1-46  
GPSFCKADEKPCEYHSDCCNCCLSGICAPSTNWILPGCSTSSFFKI  
>sp|Q7Z096|37-79  
GPSFCKADEKPCKYHADCCNCCLGGICKPSTSWIGCSTNVFLT  
>sp|Q7Z0A5|1-44  
GHVPCGKDGRKCGYHADCCNCCLSGICKPSTSWTGCSTSTVQLT  
>sp|P0C349|1-22  
RHGCCCKGPKGCSSRECRPQHCC  
>sp|C1J5M5|52-74  
VTDRCCKGKRECGRWCRDHSRCC  
>sp|P0C1T9|1-22  
GRCCDVPNACSGRWCRDHAQCC  
>sp|P0C1U1|1-22  
GRCCEGPNGCSSRWCKDHARCC  
>sp|P01523|51-72  
RDCCTPPKKCKDRQCKPQRCCA  
>sp|P0C195|1-16  
CCNCSSKWCRDHSRCC  
>sp|P58925|50-71  
QRLCCGFPKSCRSRQCKPHRCC  
>sp|P60207|7-28  
QRCCNGRRGCSSRWCRDHSRCC  
>sp|Q86DU6|52-71  
QNCCNGGCSSKWCRDHARCC  
>sp|C1J5M6|52-75  
VGERCCKNGKRGCGRWCRDHSRCC  
>sp|P0C1U0|1-25  
QGCGEPNLCFTRWCRNARCCRQQ  
>sp|P01524|1-22

RDCCTPPRKCKDRRCKPMKCCA  
 >sp|P0CH16|1-22  
 ERVCCGYPMSCSRACKPSYCC  
 >sp|P0C8V3|1-23  
 QKCCTGKKGSCSGRACKNLRCCA  
 >sp|C1J5M7|52-77  
 IVDRCCKNGKRGCSRWC RDHSRCC  
 >sp|Q9BP55|25-41  
 CCKYGWTCVLGCSPCGC  
 >sp|P0C8V5|52-83  
 DECFSPGTFCGIKPGLCCSAWCYSFFCLTLTF  
 >sp|P0CB09|52-78  
 WCKQSGEMCNLLDQNCCEGYCIVLVCT  
 >sp|P0C8V6|52-83  
 DECYPPTFCGIKPGLCCSERCFPFVCLSLEF  
 >sp|P58913|52-80  
 EACYAPGTFCGIKPGLCCSEFCLPGVCFG  
 >sp|Q26443|52-82  
 ACSKKWEYCIVPILGFVYCCPGLICGPFVVCV  
 >sp|P60179|1-26  
 CKQAGESCDIFSQNCCVGTCAFICIE  
 >sp|P69748|52-78  
 DGCSNAGAFCGIHPGLCCSEICIVWCT  
 >sp|P69749|52-78  
 DECSAPGAFCLIRPGLCCSEFCFFACF  
 >sp|P69750|52-82  
 YECYSTGTFCGINGGLCCSNLCLFFVCLTFS  
 >sp|P60513|1-32  
 DDCIKPYGFCSLPILKNGLCCSGACVGVCADL  
 >sp|Q9TWM7|49-77  
 VKPCRKEGQLCDPIFQNCCRGWNCVLFVCV  
 >sp|P69753|52-83  
 DGCYNAGTFCGIRPGLCCSEFCFLWCITFVDS  
 >sp|P69755|52-83  
 DECYPPTFCGIKPGLCCSAICLSFVCISFDF  
 >sp|P0CC15|1-32  
 DECFSPGTFCGFKPGLCCSARCFSLFCISLEF  
 >sp|A6YR20|43-87  
 DVCDSLVGGHCIHNGCWCDQEAPHGNCCDTDGCTAAWWCPGTKWD  
 >sp|Q1A3R1|51-62  
 DCCPAKLLCCNP  
 >sp|Q9U657|53-83  
 TCQRRWDFCPGALVGVITCCGGLICLGVMCI

### 3. The 45 conotoxins of Ca-channel-targeting type

>sp|Q1L777|22-37  
 GCCSHPACSVNHPELC  
 >sp|Q9U648|53-76  
 CYDGGTSCDSGIQCCSGWCIFVCL  
 >sp|Q5K0D6|43-78

ATDCIEAGNYCGPTVMKICCGFCSPYSKICMNYPKN  
>sp|Q5K0D5|49-72  
CRPSGSPCGVTSICCGRCSRGKCT  
>sp|Q9XYZ1|47-74  
TCNTPTQYCTLHRHCCSLYCHKTIHACA  
>sp|Q5K0B9|52-80  
VCIADDMPCGFGFLFGGPLCCSGWCLFVCL  
>sp|Q5K0C0|52-81  
GCLPDEYFCGFSMIGALLCCSGWCLGICMT  
>sp|Q9XZK2|46-70  
CKAAGKPCSRIAYNCCTGSCRSGKC  
>sp|Q9U651|52-76  
CLDAGEICDFFFPTCCGYCILLFCA  
>sp|Q9XZL1|53-81  
YDCEPPGNFCGMIKIGPPCCSGWCFFACA  
>sp|Q9U654|51-76  
CVPYEGPCNWLTONCCDATCVVFWCL  
>sp|Q9XZK4|43-77  
STSCMEAGSYCGSTTRICCGYCAYFGKKCIDYPSN  
>sp|P0CB10|52-77  
CTQSGELCDVIDPDCCNNFCIIFFCI  
>sp|P0C8V8|46-70  
CKGKGASCSRTMYNCCTGSCNRGKC  
>sp|P0C831|46-71  
CKGKGAPCRKTMIDCCSGSCGRRGKC  
>sp|Q3YED6|53-82  
DDECEPPGDFCGFFKIGPPCCSGWCFLWCA  
>sp|P0CI41|1-13  
NCPAGCRSQGCCM  
>sp|P58917|46-70  
CKSTGASCRRTSYDCCTGSCRSGRC  
>sp|P01522|46-73  
CKSPGSSCSPTSYNCCRSCNPYTKRCYG  
>sp|Q9XYZ0|51-80  
DCRPVGQYCGIPYEHNRCCSQLCAIICVS  
>sp|P28881|46-71  
CKLKGQSCRKTSYDCCSGSCGRSGKC  
>sp|P58920|46-72  
CKSKGAKCSKLMYDCCSGSCSGTVGRC  
>sp|Q9XZL3|51-82  
NYCQEKWDYCPVPFLGSRYCCDGLFCTLFFCA  
>sp|P05484|46-70  
CKGKGAKCSRLMYDCCTGSCRSGKC  
>sp|Q5K0C4|52-80  
CDEEGTGCSSDSECCSGRCTPEGLFEFCE  
>sp|P0C832|5-37  
CMEAGSYCGSTTRICCGYCAYSASKNVCDYPSN  
>sp|P56712|46-76  
GCLEVDYFCGIPFANNGLCCSGNCFVCTPQ  
>sp|P58914|1-27  
CKPPGSPCRVSSYNCCSSCKSYNKKCG

>sp|P58918|1-25  
CKGKGASCRKTMXDCCRGSCSRGRC  
>sp|P58919|1-26  
CKGKGQSCSKLMDCCCTGSCSRRGKC  
>sp|P0CY69|28-62  
STSCVEAGSYCRPNVKLCCGFCSPYSKICMNF PKN  
>sp|P0CY60|46-70  
CKGPGAKCLKTMXDCCKYSCSRGRC  
>sp|P05483|1-29  
CKSPGTPCSRGMRDCCTSCLLYSNKCRRY  
>sp|P58916|1-27  
CKGKGAPCTRLMDCCCHGSCSSSKGRC  
>sp|Q26350|4-28  
CQGRGASCRKTMXNCCSGSCNRGRC  
>sp|P56714|52-77  
CKQADEPCDVFSLDCCCTGICLGVCMMW  
>sp|P83301|1-33  
EDCIAVGQLCVFVNIGRPCCSGLCVFACTVKLP  
>sp|P0C248|1-8  
GCPWDPWC  
>sp|P0CY84|55-62  
KCPWSPWC  
>sp|P0C249|1-8  
GCVLYPWC  
>sp|Q2I2P3|55-62  
GCPWEPWC  
>sp|P62903|52-62  
NESECPWHPWC  
>sp|Q9BPG6|51-63  
ECCEDGWCCTAAP  
>sp|Q9BH84|51-78  
VCVDGGTFCGFPKIGGPCCSGWCIFVCL  
>sp|Q9BP99|52-84  
DCRALGEYCGLPYVHNSRCCSQLCGFICVPESP
