# Supplementary material for: iCTX-Type: A Sequence-Based Predictor for Identifying the Types of Conotoxins in Targeting Ion Channels
Source: Hindawi journal article supplement (doi:10.1155/2014/286419), 2014-01-01
Supplement: f2 [file 286419.f2.pdf]

**Supporting Information S2.** The independent dataset  $S^{Ind}$  contains 70 conotoxins, of which 12 are of K-channel-targeting type, 37 of Na-channel-targeting type, and 21 of Ca-channel-targeting type. None of the samples listed here occurs in the benchmark dataset  $S$ .

### 1. The 12 conotoxins of K-channel-targeting type

```
>sp|P0C830|1-34
QKELVPSKTTTCCGYSPGTMCPSCMCTNTCPPQK
>sp|P0C1X1|39-74
APELVVTATTNCCGYNPMTICPPCMCTYSCPPKRKP
>sp|P0C828|39-68
QKSLVPSVITTTCCGYDPGTMCPPCRCTNSC
>sp|P0CE76|39-75
APWLVPSTITTCCGYDPGSMCPPCMNNNTCKPKPKKS
>sp|P69501|27-59
SRCFPPGIYCTPYLPCCWGICCDTCRNVCHLRF
>sp|C7DQB7|27-59
SRCFPPGIYCTPYLPCCWGICCGTCRNVCHLRF
>sp|P0C252|1-31
CFPPGIYCTPYLPCCWGICCGTCRNVCHLRI
>sp|Q9U3Z3|27-57
CRAEGTYCENDSQCCLECCWGGCGHPCRHP
>sp|Q7YZS9|27-59
SRCFPPGIYCTPYLPCCWGICCGTCRNVCHLRI
>sp|Q0N4U5|40-64
GPGSAICNMACRLEHGHLYPFCNCD
>sp|Q0N4U6|40-64
GPGSAICNMACRLEHGHLYPFCHCR
>sp|P84704|1-27
GGLGRCIYNCMNSGGGLSFIQCKTMCY
```

### 2. The 37 conotoxins of Na-channel-targeting type

```
>sp|P58928|1-30
APWLVPSEQITTCCGYNPGMTCPSCMCTNTC
>sp|Q7Z0A6|1-42
GHVPCGKDGRKCGYHADCCNCCLSGICKPSTSWTGCSTSTFD
>sp|Q7Z099|1-45
GAVPCGKDGRQCRNHADCCNCCPIGTAPSTNWILPGCSTGPFMT
>sp|P0C614|1-42
GHVPCGKDGRKCGYHADCCNCCLSGICKPSTSWTGCSTSTFD
>sp|Q7Z098|1-45
GAVPCGKDGRQCRNHADCCNCCPIGTAPSTNWILPGCSTGQFMT
>sp|P0C610|1-43
GCKKDRKPCSYHADCCNCCLSGICAPSTNWILPGCSTSSFFKI
>sp|P0C611|1-46
GPSSCKADEEPCEYHADCCNCCLSGICAPSTNWILPGCSTSSFFKI
>sp|Q7Z094|1-46
GPSFCKADEKPCSYHADCCNCCLSGICAPSTNWILPGCSTSSFFKI
>sp|Q7Z092|1-46
GPSFCKANGKPCSYHADCCNCCLSGICKPSTNVILPGCSTSSFFRI
```

>sp|Q7Z091|1-41  
GCKKDRKPCSYHADCCNCCLSGICAPSTNWILPGCSTSTFT  
>sp|Q7Z0A2|1-42  
GHVPCGKDGRKCGYHADCCNCCLSGICKPSTSWTGCSTSTFN  
>sp|Q7Z0A1|1-42  
GHVPCGKDGRKCGYHTHCCNCCLSGICKPSTSLIGCSTSSFT  
>sp|Q7Z093|1-46  
GPSFCKANGKPCSYHADCCNCCLSGICAPSTNWILPGCSTSSFFKI  
>sp|Q7Z097|1-45  
GAVPCGKDGRQCRNHADCCNCCPFGTCAPSTNRILPGCSTGMFLT  
>sp|Q7Z0A0|1-43  
GHVSCGKDGRACDYHADCCNCCLGGICKPSTSWIGCSTNVFLT  
>sp|Q7Z0A4|1-44  
GHVPCGKDRRKCGYHADCCNCCLSGICKPSTSWTGCSTSTFLLT  
>sp|Q7Z0A3|1-44  
GHVPCGKDGRKCGYHADCCNCCLSGICKPSTSWTGCSTSTFLLT  
>sp|P0C1U2|1-22  
QGCCNVPNGCSGRWCRDHAQCC  
>sp|P0C8V2|1-22  
RCCTGKKGSCSGRACKNLKCCA  
>sp|P0C350|1-22  
RHGCCCKGPKGCSSRECRPQHCC  
>sp|P0CE77|1-20  
QNCCNNGCSSKWCKGHARCC  
>sp|P05482|1-22  
RDCCTPPKKCKDRRCKPLKCCA  
>sp|P58926|1-17  
CKYGTCLLGCSPCGC  
>sp|P0C8V7|52-81  
YECYSTGTFCGVNGLCCSNLCLFFVCLFS  
>sp|B2KJ30|54-78  
CSNAGGFCGIHPGLCCSEICLVWCT  
>sp|P18511|52-78  
WCKQSGEMCNLLDQNCDDGYCIVLVCT  
>sp|Q9U655|52-78  
WCKQSGEMCNLLDQNCDDGYCIVLVCT  
>sp|Q9XZK5|52-82  
DGCSSGGTFCGIHPGLCCSEFCFLWCITFID  
>sp|P56710|1-31  
SKCFSPGTFCGIKPGGLCCSVRCFSLFCISFE  
>sp|P69757|52-82  
DGCSSGGTFCGIRPGLCCSEFCFLWCITFID  
>sp|P0CC13|1-32  
DECFSPGTFCGTPGLCCSARCSFFCISLEF  
>sp|P69752|1-29  
EACYPPGTFCGIKPGGLCCSELCLPAVCVG  
>sp|P69754|52-83  
EACYNAGSFCGIHPGLCCSEFCILWCITFVDS  
>sp|P0CC14|1-32  
DECFSPGTFCGIKPGGLCCSARCLSFFCISLEF  
>sp|P69756|1-32

EACYNAGTFCGIKPGLCCSAICLSFVCISFDF  
>sp|P69751|52-78  
YGCSNAGAFCGIHPGLCCSELCLVWCT  
>sp|I1SB07|1-22  
QGCCNGPKGCSSKWCRDHARCC

### 3. The 21 conotoxins of Ca-channel-targeting type

>sp|Q5K0D8|43-78  
AADCIEAGNYCGPTVMKLCCGFCSPYSKICMNYPKN  
>sp|Q9XZL0|53-76  
CYDGGTSCDSGIQCCSGWCIFVCF  
>sp|Q9U650|51-75  
CLDAGEICDFFFPTCCGYCILLFCA  
>sp|Q9XZK3|43-78  
ATDCIEAGNYCGPTVMKICCGFCSPYSKICMNYPKN  
>sp|Q9XZL2|51-76  
CVPYEGPCNWLTONCCDATCVVFWCL  
>sp|Q9XZL4|49-72  
CRPSGSPCGVTSICCGRCYRGKCT  
>sp|Q3YEF3|52-76  
CLDAGEVCDIFFPTCCGYCILLFCA  
>sp|Q9XZL5|49-72  
CRPSGSPCGVTSICCGRCSRKCT  
>sp|P0CB11|53-76  
CYDGGTSCNTGNQCCSGWCIFLCL  
>sp|P0C8V9|43-78  
ATDCIEAGNYCGPTVMKICCGFCSPFSKICMNYPQN  
>sp|P28880|49-72  
CRSSGSPCGVTSICCGRCYRGKCT  
>sp|Q5K0D3|51-77  
SYCGSTTRICCGYCAYFGKKCIDYPSN  
>sp|Q9XZK8|52-76  
CLDAGEVCDIFFPTCCGYCILLFCA  
>sp|P58915|1-26  
CLSPGSSCSPTSYNCCRSCNPYSRKC  
>sp|P56713|53-82  
DDCEPPGNFCGMIKIGPPCCSGWCFFACA  
>sp|P05485|1-25  
CKGKGASCHRTSYDCCTGSCNRGKC  
>sp|P37300|3-28  
CKGKGAPCRKTMIDCCSGSCGRRGKC  
>sp|Q9U644|52-82  
DCQEKWDFCPAPFFGSRYCCFGLFCTLFFCA  
>sp|Q9U645|53-81  
DDCEPPGNFCGMIKIGPPCCSGWCFFACA  
>sp|Q9BPA5|51-78  
DCVAGGHFCGFPGKIGGPCCSGWCFFVCA  
>sp|P0C250|1-8  
GCPWDPWC
